# Supplementary material
Source: PubMed Central journal article supplement (PMC4376022)
Supplement: NIHMS659782-supplement-supplemental.pdf [file NIHMS659782-supplement-supplemental.pdf]

## Supplementary

**Table 1** Gene primer sequences

| Gene                             | 5'-3' sequences <sup>a</sup>                              |
|----------------------------------|-----------------------------------------------------------|
| <b>FGF21</b>                     | F: ATGGGGCCCTGTATGGAT<br>R: GGTAAACATTGTATCCGTTCTCAA      |
| <b><math>\beta</math>-Klotho</b> | F: ACGGCCATCTACATGATGAA<br>R: CGTATTTTCATCTAACCTTATTGCTTG |
| <b>FGFR1</b>                     | F: ACAACCTGCCTTATGTCCAGA<br>R: TCCATCTCTTTGTCCGGTGGT      |
| <b>FGFR2</b>                     | F: TGCATGGTTGACAGTTCTGC<br>R: CCCTATGCAGTAAATGGCTATCTC    |
| <b>FGFR3</b>                     | F: TGGGTTTTCTCATCACTCTGC<br>R: GATGCCTGCATACACACTGC       |
| <b>GAPDH</b>                     | F: TGACAACAGCCTCAAGATCG<br>R: TGAGTCCTTCCACGATACCA        |
| <b>RPL13A</b>                    | F: GCGTCTGAAGCCTACGAGAA<br>R: TCTCCTCCAAGGTGGCTGT         |

<sup>a</sup> F, forward primer; R, reverse primer.

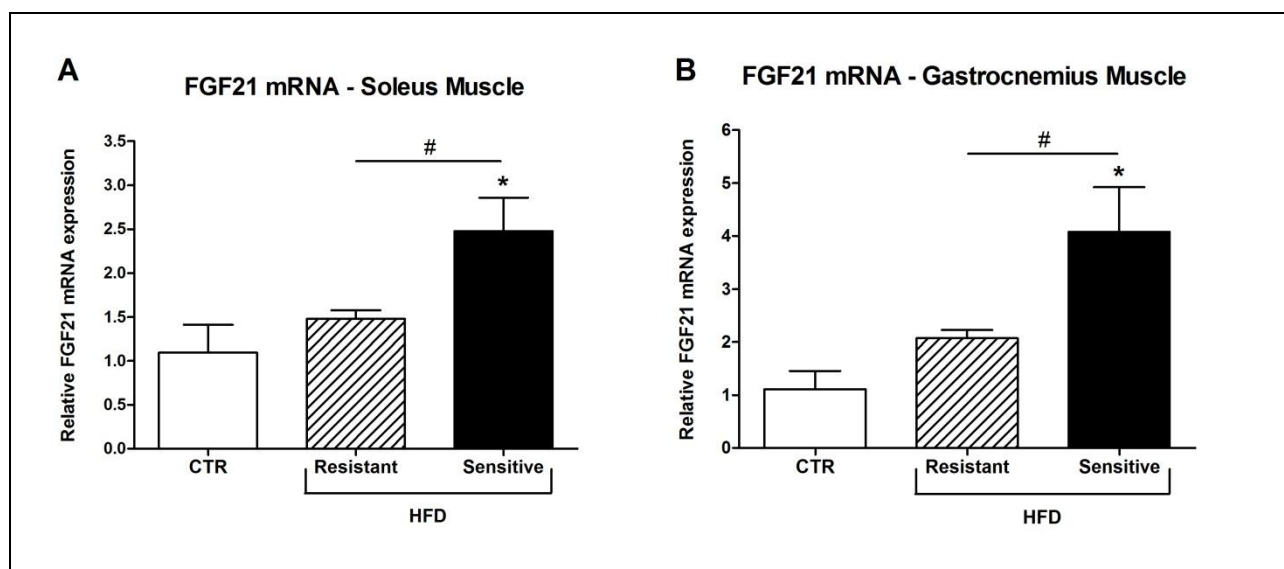

**Figure 1.** FGF21 mRNA expression in soleus and gastrocnemius muscle. FGF21 mRNA expression in (A) soleus and (B) gastrocnemius muscle from male rhesus macaques on control diet or a high-fat diet to which they were either resistant or sensitive,  $n = 3/\text{group}$ . Data are means  $\pm$  SEM; \* $p < 0.05$  versus control fed rhesus monkeys; # $p < 0.05$ .
